# Supplementary material for: Production of Injectable Marine Collagen-Based Hydrogel for the Maintenance of Differentiated Chondrocytes in Tissue Engineering Applications
Source: MDPI journal article supplement (doi:10.3390/ijms21165798), 2020-08-12
Supplement: s1 [file s1]

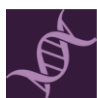

## Supplementary Material

**Table S1.** After the desalination process, each sample was weighed and from this value it was possible to obtain both the amount of water, which represents approximately 98% by weight, and the hypothetical amount of proteins, mainly collagen, for the remaining 2% in weight.

|              | Fresh Weight<br>(gr) | Amount of Water (mL)<br>≈ 98% | Amount of Proteins (gr) ≈<br>2% | Protein Concentrations<br>(mg/mL) |
|--------------|----------------------|-------------------------------|---------------------------------|-----------------------------------|
| Umbrella 1#  | 560                  | 557.62                        | 11.38                           | 20.41                             |
| Oral Arms 1# | 604.17               | 592.09                        | 12.08                           | 20.4                              |
| Umbrella 2#  | 411.6                | 403.37                        | 8.23                            | 20.4                              |
| Oral Arms 2# | 214.48               | 210.19                        | 4.29                            | 20.41                             |

**Table S2.** Respective volumes of water and acetic acid [17,5 N] to added at each sample to obtain a final concentration solution of: [0,05 N] (A); [0,1 N] (B);[0,5 N] (C).

(A)

|              | Amount of Water<br>into the Sample<br>(mL) | Complementary Quantity of Water<br>to Obtain a Final Volume of<br>600mL | mL of CH <sub>3</sub> COOH [17.5 N]<br>Added to the Final<br>Volume | (CH <sub>3</sub> COOH) Cf<br>for 6 Days |
|--------------|--------------------------------------------|-------------------------------------------------------------------------|---------------------------------------------------------------------|-----------------------------------------|
| Umbrella 1#  | 557.62                                     | 40.66                                                                   | 1.72                                                                | 0.05 N                                  |
| Oral Arms 1# | 592.09                                     | 6.19                                                                    | 1.72                                                                | 0.05 N                                  |
| Umbrella 2#  | 403.37                                     | 194.91                                                                  | 1.72                                                                | 0.05 N                                  |
| Oral Arms 2# | 210.19                                     | 388.09                                                                  | 1.72                                                                | 0.05 N                                  |

(B)

| Volume of Each<br>Solution | Increase in CH <sub>3</sub> COOH [17.5 N] Concentration (mL<br>Added to Each Sample) | (CH <sub>3</sub> COOH) Cf for 10 Days |
|----------------------------|--------------------------------------------------------------------------------------|---------------------------------------|
| 600 mL                     | 1.71 mL                                                                              | 0.1 N                                 |

(C)

| Volume<br>of Each<br>Solution | Complementary<br>Quantity of Water to<br>Obtain a Final Volume<br>of 630mL | Increase in CH <sub>3</sub> COOH [17.5N]<br>Concentration (mL Added toEach<br>Sample) | (CH <sub>3</sub> COOH) Cf for 4 Days |
|-------------------------------|----------------------------------------------------------------------------|---------------------------------------------------------------------------------------|--------------------------------------|
| 601.71 mL                     | 6.86 mL                                                                    | 18 mL                                                                                 | 0.5 N                                |

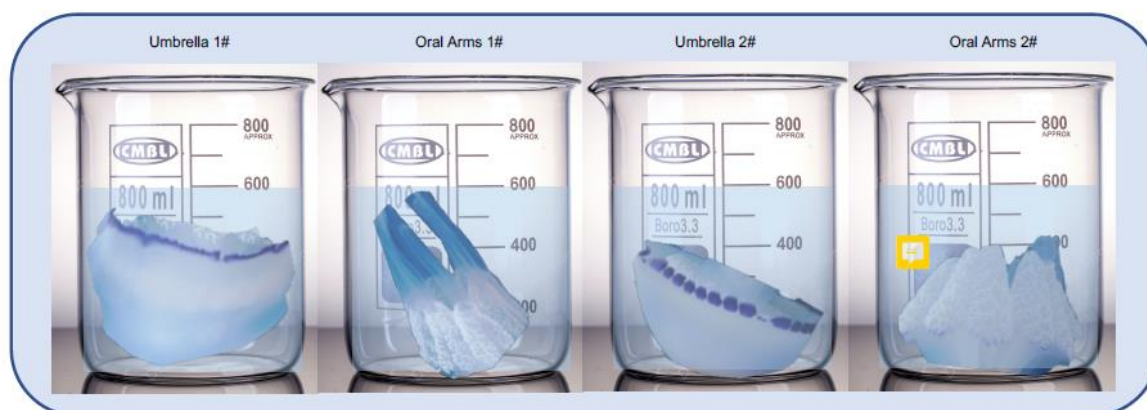

**Figure S1.** Each sample was incubated in a gradually increasing concentration of acetic acid solution up to the concentration of [0.5 N]. The protein extraction process was carried out at 4 °C for a total of 20 days.
